# Supplementary material
Source: publisher site journal article supplement (https://www.dovepress.com/article/324099)
Supplement: Supplementary file 1 [file get_supplementary_file.php]

Table 1 Baseline and after-treatment values between different treatment groups

| *Total patients: 199* | **Benralizumab (32)** | **Mepolizumab (83)** | **Omalizumab (54)** | **Thermoplasty (30)** | **p value** |
| --- | --- | --- | --- | --- | --- |
| **Eos (cell/mmc), mean ± SD** |  |  |  |  |  |
| **Pre** | 787.3 ± 905.2 | 623.9 ± 591.7 | 351.4 ± 362.7 | 348.3 ± 537.5 | <0.0001 |
| **Post** | 0.0 ± 0.0 | 139.2 ± 389.9 | 331.8 ± 293.5 | 392 ± 284.3 | <0.0001 |
| **Eos (%), mean ± SD** |  |  |  |  |  |
| **Pre** | 9.2 ± 5.3 | 8.1 ± 6 | 6.4 ± 8.1 | 3.6 ± 5.4 | <0.0001 |
| **Post** | 0.06 ± 0.04 | 1.9 ± 4.1 | 4.3 ± 3.5 | 4.9 ± 3.4 | <0.0001 |
| **Neutr (cell/mmc), mean ± SD** |  |  |  |  |  |
| **Pre** | 4116.7 ± 1211.2 | 4732.9 ± 1723.1 | 4733 ± 2135.4 | 4642.6 ± 1932.8 | 0.72 |
| **Post** | 4069.7 ± 1531 | 5347.8 ± 1334.4 | 4509.8 ± 1465.5 | 4378.5 ± 1647.4 | 0.0005 |
| **Neutr (%), mean ± SD** |  |  |  |  |  |
| **Pre** | 49.8 ± 8 | 55.6 ± 11.8 | 56.8 ± 12.9 | 52.3 ± 14.3 | 0.069 |
| **Post** | 53.5 ± 13.1 | 59.2 ± 8.2 | 56.5 ± 7.8 | 50.5 ± 11.6 | 0.0002 |
| **IgE tot (kU/L), mean ± SD** |  |  |  |  |  |
| **Pre** | 353.7 ± 504.7 | 317.9 ± 507.7 | 577.4 ± 886.1 | 165.9 ± 288.8 | <0.0001 |
| **Post** | 271.8 ± 428.2 | 229.2 ± 504.8 | 578 ± 621 | 166.5 ± 192.9 | <0.0001 |
| **ACT, mean ± SD** |  |  |  |  |  |
| **Pre** | 15.3 ± 3.9 | 15.3 ± 4.2 | 14.7 ± 3.7 | 13.9 ± 3.8 | 0.44 |
| **Post** | 19.5 ± 4.8 | 22.7 ± 2.5 | 22 ± 2.1 | 19.9 ± 4.4 | <0.0001 |
| **ACQ, mean ± SD** |  |  |  |  |  |
| **Pre** | 3.4 ± 0.8 | 3.5 ± 0.6 | 2.9 ± 0.7 | 3.2 ± 0.9 | 0.007 |
| **Post** | 1.1 ± 1.4 | 2.3 ± 0.9 | 1.8 ± 0.7 | 2.1 ± 0.9 | 0.0003 |
| **AQLQ, mean ± SD** |  |  |  |  |  |
| **Pre** | 3.9 ± 1.1 | 3.9 ± 0.9 | 4.7 ± 1 | 3.6 ± 1.1 | 0.0015 |
| **Post** | 4.4 ± 1 | 4.9 ± 1.1 | 5.5 ± 0.9 | 4.8 ± 1.2 | 0.0047 |
| **Hospitalizations in the last year, mean ± SD** |  |  |  |  |  |
| **Pre** | 0.4 ± 1.2 | 0.3 ± 0.8 | 0.3 ± 0.6 | 1.1 ± 1.6 | 0.008 |
| **Post** | 0.3 ± 1.1 | 0.03 ± 0.2 | 0.04 ± 0.2 | 0.07 ± 0.2 | 0.18 |
| **Exacerbations in the last year, mean ± SD** |  |  |  |  |  |
| **Pre** | 2.4 ± 2.6 | 5.3 ± 2.2 | 4.1 ± 2.1 | 5.6 ± 3.3 | <0.0001 |
| **Post** | 0.8 ± 2 | 0.4 ± 0.9 | 0.5 ± 0.6 | 1.5 ± 1 | 0.0024 |
| **FEV1 (L), mean ± SD** |  |  |  |  |  |
| **Pre** | 1.8 ± 0.8 | 1.9 ± 0.8 | 1.9 ± 0.8 | 2 ± 0.7 | 0.39 |
| **Post** | 2.4 ± 1 | 2.2 ± 0.8 | 2.2 ± 1 | 2.2 ± 0.8 | 0.66 |
| **FEV1 (%), mean ± SD** |  |  |  |  |  |
| **Pre** | 60.5 ± 19.7 | 70.4 ± 19.5 | 65.4 ± 13.2 | 72.1 ± 19.8 | 0.036 |
| **Post** | 80.9 ± 23.5 | 82.3 ± 15.9 | 73.7 ± 16.5 | 70.6 ± 21.2 | 0.0046 |
| **FVC (L), mean ± SD** |  |  |  |  |  |
| **Pre** | 2.8 ± 0.9 | 2.8 ± 1 | 3 ± 1.1 | 3.3 ± 0.9 | 0.13 |
| **Post** | 3.4 ± 1.3 | 3 ± 1.1 | 3.2 ± 1.3 | 3.2 ± 1 | 0.65 |
| **FVC (%), mean ± SD** |  |  |  |  |  |
| **Pre** | 78.5 ± 18.9 | 83.1 ± 16 | 83.4 ± 17.3 | 92.9 ± 17.4 | 0.0054 |
| **Post** | 93 ± 21.7 | 93.2 ± 14.6 | 84.2 ± 20.6 | 84 ± 18.5 | 0.011 |
| **FEV1/FVC, mean ± SD** |  |  |  |  |  |
| **Pre** | 64.2 ± 10.1 | 67.8 ± 10.9 | 69.3 ± 12.2 | 66 ± 14.8 | 0.31 |
| **Post** | 69.6 ± 12.2 | 72.4 ± 8.9 | 69.6 ± 10.7 | 69.2 ± 12.9 | 0.41 |
| **ICS (mcg/die), mean ± SD** |  |  |  |  |  |
| **Pre** | 1126.2 ± 463.9 | 1073 ± 432.1 | 712.8 ± 282.2 | 1305 ± 601.6 | <0.0001 |
| **Post** | 1095 ± 488.4 | 1072 ± 425.6 | 850.1 ± 432.9 | 1393 ± 595.7 | 0.0007 |
| **OCS (mg/die), mean ± SD** |  |  |  |  |  |
| **Pre** | 4.4 ± 7.6 | 5.1 ± 7.1 | 2.4 ± 4.6 | 14.6 ± 10.4 | <0.0001 |
| **Post** | 3.4 ± 7.5 | 1.1 ± 4.6 | 0.6 ± 1.7 | 3.5 ± 4.9 | 0.022 |
| **LAMA, n (%)** |  |  |  |  |  |
| **Pre** | 26 (81) | 70 (84.3) | 27 (50) | 17 (56.7) | <0.0001 |
| **Post** | 23 (72) | 55 (63.3) | 23 (42.6) | 23 (76.7) | 0.004 |
| **LTRA, n (%)** |  |  |  |  |  |
| **Pre** | 16 (50) | 34 (41) | 33 (61) | 11 (36.7) | 0.07 |
| **Post** | 14 (44) | 22 (26.5) | 29 (53.7) | 5 (16.7) | 0.0009 |
| **Theophylline, n (%)** |  |  |  |  |  |
| **Pre** | 5 (16) | 6 (7.2) | 5 (9.3) | 5 (16.7) | 0.37 |
| **Post** | 5 (16) | 0 (0) | 0 (0) | 1 (3.3) | <0.0001 |
